# Supplementary material
Source: Elsevier journal article supplement (https://www.sciencedirect.com/science/article/pii/S0210570522001571)
Supplement: mmc1 [file S0210570522001571:mmc1.doc]

**Appendix A. SARS-Cov-2 vaccine acceptance survey in patients with inflammatory bowel disease using biologic treatments.**

1-Have you ever had COVID 19 infection? *Yes/No*

2-Have you been vaccinated against COVID? *Yes / No*

- If you have not been vaccinated, what is the cause?

*Fear of side effects / Fear of "new" vaccine / "You have NOT been called for vaccination"/ Others*:

-Is any action possible to change this decision?

*The information provided by the survey call (which encourages you to get vaccinated) makes you change your mind: *yes/no*

*Consult with your regular doctor or Unit nurse: *yes/no*

*Providing information about the vaccine and its side effects: *yes/no*

*Provide data on the adverse effects of the vaccine: *yes/no*

*Others:

3-If you have been vaccinated, did the health center give you an appointment for the vaccine or did you make the appointment yourself?

*You were called / Did you make the appointment?*

4-In deciding to get vaccinated, did you consult with your primary care physician or IBD Unit?

*Primary Care / Digestive / Neither*

5-Were you afraid to get vaccinated because of your treatment? *Yes / No*

6-Type of immunosuppressive treatment:

7-Did you have any side effects from the vaccine?

*Fever/ Headache/ Arm pain/ Diarrhea/ Others:*

8-Would you say that your disease was made worse by the vaccination: *Yes / No.*

9-Would you get vaccinated again if necessary? *Yes / No*

-If not, what is the cause?

*Not necessary/ Because of side effects in previous doses/ Other:*

**Appendix B. Clinical characteristics and vaccination status of included IBD patients with COVID19 infection.**

| **Number of patients** | **Gender** | **Age** | **Type of IBD** | **Type of biologic agent** | **Associated IMM** | **COVID19 vaccination** | **COVID19 infection before vaccination** | **Hospitalization due to COVID19 infection** |
| --- | --- | --- | --- | --- | --- | --- | --- | --- |
| 1 | F | 22 | Crohn´s Disease | Adalimumab | No | NO | Yes | NO |
| 2 | F | 61 | Crohn´s Disease | Ustekinumab | No | NO | Yes | NO |
| 3 | F | 56 | Crohn´s Disease | Ustekinumab | No | Yes | Yes | NO |
| 4 | M | 25 | Ulcerative Colitis | Vedolizumab | Yes  (Azatioprine) | Yes | Yes | NO |
| 5 | M | 63 | Crohn´s Disease | Infliximab | No | Yes | Yes | NO |
| 6 | M | 45 | Crohn´s Disease | Adalimumab | Yes  (Azatioprine) | Yes | NO | NO |
| 7 | M | 49 | Crohn´s Diseas | Adalimumab | No | Yes | Yes | NO |

F: Female; M: Male; IBD: Inflammatory bowel disease; IMM: Immunomodulators.
